# Supplementary material
Source: PubMed Central journal article supplement (PMC3119603)
Supplement: Supp_Data.pdf [file Supp_Data.pdf]

## SUPPLEMENTARY MATERIAL

### *Supplementary methods*

Benchmarks were done on a SMP server with 128 GB of memory and 32 AMD Opteron cores (8 quad-core processors). Open-MPI version 1.4.1 was utilized.

Ray is available and distributed as a source-code package, and can be downloaded on SourceForge.Net, a collaborative web site for open source software acting as a public repository for bioinformatics software.

Exact parameters for each assembler on each dataset are listed in the scripts directory inside Ray source-code distribution.

Availability: <http://denovoassembler.sf.net/>.

### *Ray license agreement (General Public License, version 3)*

Availability: [www.gnu.org/licenses/gpl.html](http://www.gnu.org/licenses/gpl.html).

TABLE S1. DATASETS DEFINED FOR COMPARISONS

| <i>Dataset</i>                                                          | <i>Description</i>                                  | <i>Reads accession key</i>    |
|-------------------------------------------------------------------------|-----------------------------------------------------|-------------------------------|
| Simulations 1: <i>Streptococcus pneumoniae</i> R6 (nucore/NC_003098)    |                                                     |                               |
| sim1                                                                    | Read length: 50, coverage: 50                       | —                             |
| sim2                                                                    | Read length: 50, coverage: 50, error rate: 1%       | —                             |
| sim3                                                                    | Fragment length: 200, read length: 50, coverage: 50 | —                             |
| Simulations 2: <i>Escherichia coli</i> K-12 MG1655 (nucore/NC_000913)   |                                                     |                               |
| sim4                                                                    | Read length: 400, coverage: 50                      | —                             |
| sim5                                                                    | Fragment length: 200, read length: 50, coverage: 50 | —                             |
| sim6                                                                    | Read length: 50, coverage: 50                       | —                             |
| Simulations 3: <i>Pseudomonas aeruginosa</i> PAO1 (nucore/NC_002516)    |                                                     |                               |
| sim7                                                                    | Read length: 40, coverage: 50                       | —                             |
| sim8                                                                    | Fragment length: 250, read length: 40, coverage: 50 | —                             |
| Mixed set 1: <i>Escherichia coli</i> K-12 MG1655 (nucore/NC_000913)     |                                                     |                               |
| mix11                                                                   | Illumina non-paired reads                           | sra/SRA001125                 |
| mix12                                                                   | Illumina paired reads                               | sra/SRA001125                 |
| mix13                                                                   | Roche/454 reads                                     | sra/SRA001028                 |
| mix14                                                                   | Roche/454+ Illumina paired reads                    | sra/SRA001125 ; sra/SRA001028 |
| Mixed set 2: <i>Acinetobacter</i> sp. ADP1 (nucore/NC_005966)           |                                                     |                               |
| mix21                                                                   | Illumina non-paired reads                           | sra/SRA003611                 |
| mix22                                                                   | Roche/454 reads                                     | sra/SRA003611                 |
| mix23                                                                   | Roche/454+ Illumina paired reads                    | sra/SRA003611                 |
| Mixed set 3: <i>Cryptobacterium curtum</i> DSM 15641 (nucore/NC_013170) |                                                     |                               |
| mix31                                                                   | Illumina non-paired reads                           | sra/SRA008863                 |
| mix32                                                                   | Roche/454 reads                                     | sra/SRA008863                 |
| mix33                                                                   | Roche/454+ Illumina paired reads                    | sra/SRA008863                 |

TABLE S2. COMPARISONS ON SIMULATIONS

| Assembler | Contigs | Bases   | Average length | Genome |                |                     |                      |                   | Running time |            |
|-----------|---------|---------|----------------|--------|----------------|---------------------|----------------------|-------------------|--------------|------------|
|           |         |         |                | N50    | Largest length | breadth of coverage | Misassembled contigs | Mismatches Indels |              |            |
| sim1      |         |         |                |        |                |                     |                      |                   |              |            |
| EULER-SR  | 261     | 1967594 | 7538           | 11621  | 61396          | 0.9419              | 6                    | 68                | 123          | 7m22.779s  |
| Velvet    | 280     | 1917129 | 6846           | 11279  | 44362          | 0.9437              | 1                    | 23                | 8            | 2m15.931s  |
| Ray       | 259     | 1954999 | 7548           | 11561  | 77867          | 0.9608              | 0                    | 0                 | 0            | 3m25.240s  |
| ABySS     | 417     | 1898819 | 4553           | 7349   | 27222          | 0.9343              | 0                    | 4                 | 0            | 1m56.066s  |
| sim2      |         |         |                |        |                |                     |                      |                   |              |            |
| EULER-SR  | 267     | 1965104 | 7359           | 11477  | 61349          | 0.9413              | 6                    | 79                | 237          | 11m15.383s |
| Velvet    | 290     | 1913682 | 6598           | 10302  | 42572          | 0.9423              | 2                    | 27                | 11           | 2m40.792s  |
| Ray       | 259     | 1939235 | 7487           | 11554  | 77853          | 0.9531              | 0                    | 0                 | 0            | 4m29.223s  |
| ABySS     | 418     | 1898547 | 4541           | 7349   | 27222          | 0.9342              | 0                    | 4                 | 0            | 4m52.727s  |
| sim3      |         |         |                |        |                |                     |                      |                   |              |            |
| EULER-SR  | 235     | 1976831 | 8412           | 12383  | 61593          | 0.9458              | 13                   | 69                | 187          | 9m59.464s  |
| Velvet    | 113     | 1950222 | 17258          | 32111  | 123292         | 0.9565              | 30                   | 382               | 140          | 2m15.371s  |
| Ray       | 96      | 1964569 | 20464          | 36692  | 127906         | 0.9632              | 0                    | 1                 | 0            | 5m52.834s  |
| ABySS     | 151     | 2019778 | 13376          | 22045  | 104182         | 0.9815              | 0                    | 213               | 9            | 3m38.944s  |
| sim4      |         |         |                |        |                |                     |                      |                   |              |            |
| Newbler   | 75      | 4559811 | 60797          | 132967 | 326953         | 0.9833              | 0                    | 0                 | 2            | 16m56.911s |
| EULER-SR  | 136     | 5399988 | 39705          | 86536  | 280065         | 0.9668              | 58                   | 106               | 903          | 19m16.247s |
| Velvet    | 693     | 4472973 | 6454           | 10495  | 53974          | 0.9638              | 0                    | 4                 | 0            | 3m42.483s  |
| Ray       | 83      | 4595945 | 55372          | 122763 | 327771         | 0.9876              | 0                    | 0                 | 0            | 17m24.874s |
| ABySS     | 898     | 4450079 | 4955           | 8141   | 35440          | 0.9573              | 0                    | 5                 | 0            | 5m51.884s  |
| sim5      |         |         |                |        |                |                     |                      |                   |              |            |
| EULER-SR  | 248     | 4711107 | 18996          | 33519  | 131097         | 0.9728              | 23                   | 84                | 1186         | 24m49.858s |
| Velvet    | 129     | 4527399 | 35096          | 68879  | 269606         | 0.9758              | 21                   | 497               | 842          | 5m33.387s  |
| Ray       | 110     | 4584885 | 41680          | 83042  | 269979         | 0.9841              | 0                    | 0                 | 0            | 12m40.040s |
| ABySS     | 147     | 4608010 | 31347          | 59697  | 174234         | 0.9880              | 0                    | 289               | 8            | 7m39.983s  |
| sim6      |         |         |                |        |                |                     |                      |                   |              |            |
| EULER-SR  | 323     | 4713939 | 14594          | 27098  | 100573         | 0.9714              | 15                   | 42                | 970          | 19m40.888s |
| Velvet    | 405     | 4504211 | 11121          | 18003  | 120868         | 0.9713              | 2                    | 60                | 32           | 4m52.789s  |
| Ray       | 317     | 4560682 | 14387          | 25607  | 120916         | 0.9780              | 0                    | 136               | 0            | 9m39.849s  |
| ABySS     | 898     | 4449989 | 4955           | 8141   | 35440          | 0.9573              | 0                    | 11                | 0            | 4m34.519s  |
| sim7      |         |         |                |        |                |                     |                      |                   |              |            |
| EULER-SR  | 422     | 7066990 | 16746          | 35498  | 170764         | 0.9833              | 16                   | 80                | 531          | 29m11.924s |
| Velvet    | 1264    | 6086321 | 4815           | 7720   | 49780          | 0.9716              | 5                    | 136               | 93           | 8m10.649s  |
| Ray       | 547     | 6143206 | 11230          | 22131  | 210111         | 0.9782              | 0                    | 0                 | 0            | 12m47.722s |
| ABySS     | 4057    | 4998428 | 1232           | 1383   | 14076          | 0.7933              | 0                    | 17                | 0            | 6m5.597s   |
| sim8      |         |         |                |        |                |                     |                      |                   |              |            |
| EULER-SR  | 251     | 6305646 | 25122          | 55095  | 182061         | 0.9871              | 13                   | 216               | 551          | 36m53.145s |
| Velvet    | 86      | 6189575 | 71971          | 289674 | 579752         | 0.9843              | 29                   | 1079              | 2433         | 7m12.569s  |
| Ray       | 122     | 6227165 | 51042          | 110638 | 346568         | 0.9919              | 0                    | 0                 | 0            | 17m3.064s  |
| ABySS     | 152     | 6416064 | 42210          | 83309  | 368070         | 0.9954              | 0                    | 455               | 11           | 11m35.355s |

TABLE S3. COMPARISON ON MIXED DATASET 1

| Assembler | Contigs | Bases   | Genome         |        |                |                     |                      |        | Running time |             |
|-----------|---------|---------|----------------|--------|----------------|---------------------|----------------------|--------|--------------|-------------|
|           |         |         | Average length | N50    | Largest length | breadth of coverage | Misassembled contigs | Indels |              |             |
| mix11     |         |         |                |        |                |                     |                      |        |              |             |
| EULER-SR  | 1937    | 4102206 | 2117           | 3001   | 19094          | 0.8656              | 12                   | 1162   | 7360         | 135m2.904s  |
| Velvet    | 528     | 4491661 | 8506           | 14236  | 60568          | 0.9672              | 26                   | 136    | 100          | 28m55.106s  |
| Ray       | 420     | 4522457 | 10767          | 16970  | 66556          | 0.9702              | 0                    | 2      | 4            | 37m57.168s  |
| ABySS     | 1026    | 4440595 | 4328           | 6898   | 34595          | 0.9550              | 0                    | 5      | 4            | 23m3.949s   |
| mix12     |         |         |                |        |                |                     |                      |        |              |             |
| EULER-SR  | 1761    | 4099614 | 2328           | 3429   | 19094          | 0.8708              | 13                   | 1173   | 7355         | 143m27.647s |
| Velvet    | 83      | 4542631 | 54730          | 125611 | 311586         | 0.9657              | 28                   | 456    | 895          | 31m51.199s  |
| Ray       | 126     | 4591168 | 36437          | 72499  | 174569         | 0.9818              | 0                    | 2      | 4            | 47m54.377s  |
| ABySS     | 154     | 4661190 | 30267          | 56703  | 174288         | 0.9840              | 0                    | 233    | 9            | 44m53.714s  |
| mix13     |         |         |                |        |                |                     |                      |        |              |             |
| Newbler   | 874     | 4513335 | 5163           | 8771   | 42344          | 0.9731              | 9                    | 64     | 247          | 29m53.841s  |
| EULER-SR  | 1538    | 5056677 | 3287           | 4969   | 26316          | 0.9600              | 68                   | 648    | 1199         | 7m49.404s   |
| Velvet    | 2415    | 3942859 | 1632           | 2068   | 10286          | 0.8499              | 13                   | 386    | 207          | 2m10.820s   |
| Ray       | 1722    | 4737188 | 2750           | 3660   | 16250          | 0.9630              | 9                    | 145    | 89           | 5m27.089s   |
| ABySS     | 2662    | 4020201 | 1510           | 1899   | 12092          | 0.8630              | 0                    | 63     | 41           | 3m45.703s   |
| mix14     |         |         |                |        |                |                     |                      |        |              |             |
| EULER-SR  | 1813    | 3538992 | 1952           | 2632   | 15039          | 0.7598              | 598                  | 1820   | 7077         | 157m46.099s |
| Velvet    | 754     | 4518284 | 5992           | 8787   | 29554          | 0.9730              | 26                   | 267    | 250          | 35m18.761s  |
| Ray       | 109     | 4579657 | 42015          | 87318  | 268385         | 0.9831              | 1                    | 234    | 6            | 62m30.978s  |
| ABySS     | 154     | 4667915 | 30311          | 56703  | 174286         | 0.9851              | 0                    | 239    | 9            | 47m12.271s  |

TABLE S4. COMPARISON ON MIXED DATASET 2

| Assembler | Contigs | Bases   | Genome         |       |                |                     |                      |        | Running time |             |
|-----------|---------|---------|----------------|-------|----------------|---------------------|----------------------|--------|--------------|-------------|
|           |         |         | Average length | N50   | Largest length | breadth of coverage | Misassembled contigs | Indels |              |             |
| mix21     |         |         |                |       |                |                     |                      |        |              |             |
| EULER-SR  | 1498    | 4706276 | 3141           | 4965  | 24129          | 0.9679              | 12                   | 1115   | 210          | 87m18.839s  |
| Velvet    | 430     | 4361792 | 10143          | 20490 | 85191          | 0.9773              | 10                   | 381    | 15           | 16m3.742s   |
| Ray       | 259     | 3677696 | 14199          | 25852 | 72730          | 0.9749              | 0                    | 82     | 6            | 29m48.993s  |
| ABySS     | 1105    | 4315007 | 3904           | 6485  | 30606          | 0.9697              | 0                    | 172    | 6            | 28m59.212s  |
| mix22     |         |         |                |       |                |                     |                      |        |              |             |
| Newbler   | 109     | 3547847 | 32549          | 61793 | 214173         | 0.9846              | 0                    | 69     | 380          | 43m3.785s   |
| EULER-SR  | 1715    | 6018217 | 3509           | 5511  | 29671          | 0.9722              | 26                   | 1421   | 12480        | 18m3.905s   |
| Velvet    | 1440    | 3356900 | 2331           | 3267  | 14690          | 0.9308              | 4                    | 704    | 3166         | 3m54.495s   |
| Ray       | 2482    | 3361598 | 1354           | 1554  | 7435           | 0.8571              | 1                    | 58     | 305          | 5m22.559s   |
| ABySS     | 2324    | 2991350 | 1287           | 1496  | 10227          | 0.8309              | 0                    | 37     | 96           | 7m4.659s    |
| mix23     |         |         |                |       |                |                     |                      |        |              |             |
| EULER-SR  | 2399    | 6932733 | 2889           | 4495  | 47460          | 0.9681              | 70                   | 2149   | 8033         | 129m53.436s |
| Velvet    | 1165    | 4285023 | 3678           | 5820  | 21242          | 0.9672              | 0                    | 753    | 3164         | 22m52.574s  |
| Ray       | 91      | 3540404 | 38905          | 82891 | 215819         | 0.9804              | 1                    | 7      | 1            | 36m27.635s  |
| ABySS     | 1198    | 4294398 | 3584           | 5748  | 30606          | 0.9677              | 0                    | 175    | 6            | 34m34.469s  |

TABLE S5. COMPARISON ON MIXED DATASET 3

| <i>Assembler</i> | <i>Contigs</i> | <i>Bases</i> | <i>Average length</i> | <i>N50</i> | <i>Genome</i> |               |                    | <i>Misassembled contigs</i> | <i>Mismatches</i> | <i>Indels</i> | <i>Running time</i> |
|------------------|----------------|--------------|-----------------------|------------|---------------|---------------|--------------------|-----------------------------|-------------------|---------------|---------------------|
|                  |                |              |                       |            | <i>length</i> | <i>length</i> | <i>of coverage</i> |                             |                   |               |                     |
| mix31            |                |              |                       |            |               |               |                    |                             |                   |               |                     |
| EULER-SR         | 166            | 109935       | 662                   | 651        | 1433          | 0.0608        | 1                  | 741                         | 620               |               | 79m50.304s          |
| Velvet           | 208            | 1598265      | 7683                  | 12698      | 54143         | 0.9890        | 11                 | 133                         | 60                |               | 13m2.283s           |
| Ray              | 72             | 1606647      | 22314                 | 36518      | 91303         | 0.9862        | 0                  | 1                           | 1                 |               | 19m51.388s          |
| ABySS            | 156            | 1596474      | 10233                 | 19950      | 69217         | 0.9881        | 0                  | 6                           | 2                 |               | 22m45.895s          |
| mix32            |                |              |                       |            |               |               |                    |                             |                   |               |                     |
| Newbler          | 30             | 1609423      | 53647                 | 261125     | 477358        | 0.9904        | 0                  | 0                           | 8                 |               | 21m24.064s          |
| EULER-SR         | 153            | 3078576      | 20121                 | 76729      | 258262        | 0.9861        | 3                  | 104                         | 430               |               | 13m55.961s          |
| Velvet           | 58             | 1600395      | 27593                 | 76702      | 191999        | 0.9914        | 4                  | 26                          | 176               |               | 3m29.796s           |
| Ray              | 184            | 1573256      | 8550                  | 14142      | 76631         | 0.9503        | 0                  | 0                           | 1                 |               | 4m42.587s           |
| ABySS            | 478            | 1566837      | 3277                  | 5064       | 16718         | 0.9689        | 0                  | 7                           | 1                 |               | 4m14.770s           |
| mix33            |                |              |                       |            |               |               |                    |                             |                   |               |                     |
| EULER-SR         | 45             | 27077        | 601                   | 567        | 1383          | 0.0023        | 6                  | 67                          | 10                |               | 87m51.332s          |
| Velvet           | 190            | 1593755      | 8388                  | 13136      | 45625         | 0.9848        | 8                  | 238                         | 1701              |               | 16m37.093s          |
| Ray              | 27             | 1602133      | 59338                 | 116274     | 236544        | 0.9897        | 0                  | 0                           | 1                 |               | 35m8.569s           |
| ABySS            | 250            | 1590298      | 6361                  | 10207      | 37072         | 0.9835        | 0                  | 4                           | 2                 |               | 23m33.000s          |
